# Supplementary material for: Clinical Follow-Up of Responses to Treatment with Benznidazol in Amazon: A Cohort Study of Acute Chagas Disease
Source: PLoS One. 2013 May 27;8(5):e64450. doi: 10.1371/journal.pone.0064450 (PMC3664625; doi:10.1371/journal.pone.0064450)
Supplement: Data S1 — Baseline descriptive results from parasitological and serological tests performed during acute infection. (XLSX) [file pone.0064450.s002.xlsx]

## Sheet: results_baseline
Year of acute infection (baseline)	Age baseline	TBF/QBC baseline	Xenodiagnosis baseline	Blood culture_baseline	IgM_baseline	IgG_baseline
2003	70	pos	pos	pos	320	80
2002	15	pos	pos	pos	40	160
2000	37	neg	pos	nr	160	160
1998	56	neg	pos	pos	0	80
2003	16	pos	neg	neg	80	320
2002	36	pos	pos	pos	40	40
2004	28	pos	pos	neg	160	80
2002	60	pos	pos	pos	640	80
2000	57	neg	pos	neg	320	80
2000	7	neg	pos	pos	80	80
2003	16	pos	neg	pos	80	160
2003	24	pos	pos	neg	160	40
2003	18	pos	neg	neg	80	160
2003	34	neg	neg	neg	40	640
2002	34	pos	pos	pos	80	320
1999	55	neg	neg	neg	1280	1280
1998	42	pos	pos	pos	160	80
2001	39	pos	pos	neg	320	80
1998	38	neg	pos	pos	40	640
2000	45	pos	pos	pos	0	160
1999	75	neg	pos	neg	160	320
1999	30	pos	pos	neg	80	160
2002	58	pos	neg	pos	80	80
2003	23	pos	pos	pos	80	160
1999	32	pos	pos	neg	80	320
2002	72	pos	pos	pos	0	80
2004	29	pos	pos	pos	40	0
2003	25	neg	neg	neg	640	80
2000	26	neg	neg	neg	160	80
2005	71	pos	neg	pos	160	80
2000	24	pos	pos	pos	40	40
2002	17	neg	pos	neg	80	40
1997	15	neg	neg	neg	320	160
1996	7	pos	neg	neg	0	40
2001	9	pos	neg	neg	40	1280
2002	16	neg	pos	neg	40	40
2002	21	neg	pos	pos	320	160
2000	45	neg	neg	neg	160	80
2002	32	neg	neg	neg	80	160
2002	16	neg	pos	pos	40	40
2000	41	pos	pos	nr	160	80
2002	23	neg	neg	pos	80	320
2004	35	pos	pos	neg	80	40
2000	30	pos	pos	pos	80	320
2003	44	pos	pos	pos	80	40
2002	70	neg	neg	pos	40	80
2004	59	neg	neg	neg	320	80
2004	65	neg	neg	pos	80	80
1999	19	neg	pos	neg	320	320
2003	22	pos	neg	pos	80	40
2003	13	pos	neg	neg	80	40
2000	70	neg	pos	neg	40	160
2002	11	neg	neg	neg	80	320
2003	45	neg	neg	neg	160	320
2005	14	pos	neg	pos	40	160
2002	76	pos	pos	pos	40	160
2005	72	pos	neg	pos	40	320
2004	51	pos	pos	pos	80	40
2000	46	pos	pos	pos	40	160
2004	26	neg	neg	neg	320	80
2000	28	neg	pos	pos	0	160
2000	31	pos	pos	pos	40	160
2001	37	pos	pos	neg	640	80
2004	11	pos	neg	neg	0	0
2003	42	pos	pos	pos	40	80
2002	22	neg	pos	neg	160	40
2004	13	pos	pos	pos	40	80
2001	33	pos	pos	neg	40	160
2000	28	neg	pos	pos	160	160
2005	23	pos	pos	pos	Missing	Missing
2000	17	pos	pos	pos	80	160
1998	18	neg	neg	neg	640	320
2003	26	pos	neg	pos	80	40
1998	26	neg	pos	pos	160	80
2004	48	pos	pos	pos	0	320
1998	11	neg	pos	nr	160	80
1998	28	neg	neg	neg	40	160
1998	45	nr	neg	neg	160	640
1988	27	neg	neg	neg	0	160
1998	27	neg	pos	neg	160	80
2002	59	pos	pos	pos	40	320
1991	29	neg	pos	neg	0	320
2003	50	neg	pos	pos	80	80
2005	38	pos	neg	pos	Missing	Missing
2003	37	pos	neg	neg	80	40
2003	22	pos	pos	pos	80	40
1996	13	pos	neg	neg	0	160
1998	46	neg	pos	pos	80	640
2004	31	pos	pos	neg	80	160
2004	22	pos	pos	pos	160	80
2004	22	pos	pos	neg	160	40
2004	47	pos	neg	neg	80	40
1992	26	neg	neg	pos	1280	320
2003	11	pos	pos	pos	40	80
2002	30	pos	pos	pos	160	0
2002	51	neg	pos	pos	160	160
2002	36	neg	neg	neg	80	80
2002	48	neg	pos	neg	160	160
2002	39	neg	pos	neg	80	40
2002	45	neg	neg	neg	320	40
2000	22	pos	pos	pos	40	80
2002	47	neg	neg	nr	40	80
2003	45	pos	pos	pos	40	80
2000	49	neg	neg	neg	320	160
2004	49	pos	neg	neg	0	80
2004	48	neg	pos	pos	40	160
2003	63	pos	pos	neg	80	80
1999	28	pos	neg	neg	0	160
2002	38	neg	pos	pos	160	320
1996	26	pos	pos	pos	0	320
2002	38	neg	pos	pos	0	40
2001	29	pos	pos	neg	80	320
2002	60	neg	neg	neg	80	80
2001	32	neg	pos	neg	1280	160
2002	45	pos	pos	neg	0	160
2002	50	neg	neg	neg	40	320
2002	34	pos	neg	neg	160	80
2003	71	pos	pos	neg	320	320
2003	48	neg	pos	pos	320	80
1998	42	neg	neg	neg	320	80
2002	20	neg	neg	neg	160	160
2003	53	pos	neg	pos	80	320
2002	62	neg	pos	nr	0	320
2002	40	neg	pos	neg	1280	160
2003	44	pos	neg	neg	160	160
2002	56	pos	neg	nr	80	320
2002	50	neg	pos	pos	80	40
2004	50	pos	pos	pos	40	640
1999	28	neg	neg	neg	40	320
1996	22	pos	pos	neg	0	80
2002	42	neg	pos	neg	160	640
2002	13	neg	pos	neg	40	320
2003	21	pos	pos	pos	320	80
2003	66	neg	neg	pos	40	40
2003	47	neg	pos	pos	80	80
2002	23	neg	pos	pos	640	0
2002	2	neg	pos	pos	80	0
2003	46	neg	pos	neg	80	40
2003	10	pos	pos	neg	320	320
2001	49	pos	pos	pos	40	320
2000	45	pos	pos	nr	40	320
2004	22	nr	pos	neg	160	80
1998	79	neg	pos	pos	160	160
1999	28	neg	neg	neg	160	640
1998	39	pos	pos	pos	0	320
2001	6	neg	neg	neg	40	80
2001	4	neg	neg	neg	40	80
2003	51	pos	pos	pos	40	80
2004	45	pos	pos	neg	40	160
2003	58	pos	pos	neg	0	0
2004	19	neg	neg	neg	80	80
2002	13	pos	neg	neg	40	160
2000	22	neg	pos	neg	320	320
1996	20	pos	pos	neg	0	80
2004	48	neg	neg	neg	40	160
1998	12	neg	pos	pos	160	80
2000	28	pos	pos	neg	0	160
2003	43	pos	neg	neg	80	80
1996	9	pos	neg	neg	0	320
2002	20	neg	pos	pos	80	40
1999	30	neg	neg	neg	0	320
2004	29	pos	pos	neg	80	40
1998	44	nr	neg	neg	320	320
2000	15	pos	pos	pos	40	160
1992	52	pos	neg	pos	320	160
1999	53	neg	neg	neg	160	640
2002	29	pos	pos	pos	80	160
1996	8	pos	pos	pos	640	0
2002	39	neg	neg	neg	80	80
2000	32	pos	pos	neg	40	160
2004	19	pos	neg	neg	320	80
2000	19	pos	pos	neg	40	80
2002	21	neg	pos	pos	80	80
2003	32	pos	neg	neg	80	40
2002	39	pos	pos	pos	0	0
2004	5	pos	pos	pos	0	0
2001	11	pos	pos	neg	160	80
2005	10	neg	neg	neg	640	160
1999	27	neg	neg	neg	0	640
