# Supplementary material for: Clinical Follow-Up of Responses to Treatment with Benznidazol in Amazon: A Cohort Study of Acute Chagas Disease
Source: PLoS One. 2013 May 27;8(5):e64450. doi: 10.1371/journal.pone.0064450 (PMC3664625; doi:10.1371/journal.pone.0064450)
Supplement: Data S2 — Baseline results methods comparison with direct parasitological tests (Thick blood film = TBF or Quantitative buffy coat = QBC). (XLSX) [file pone.0064450.s003.xlsx]

## Sheet: TBF_QBCPOSITI_NEGATIVE
	Results of another parasitological and serological tests from patients with positive results in parasitological direct tests
		Results	xenodiagnosis	%	Blood culture	%	IgM	%	IgG	%
		pos	66	69.5	50	53.8	75	80.6	88	92.6
		neg	29	30.5	42	46.2	18	19.4	7	7.4
			95		92		93		95
	Results of another parasitological and serological tests from patients with negative results in parasitological direct tests
		Results	xenodiagnosis	%	blood culture	%	IgM	%	IgG	%
		pos	43	53.09	28	36.4	70	90.12	75	97.5
		neg	38	46.91	49	63.6	8	9.88	2	2.5
			81		77		78		77
